# Supplementary material for: N6-methyladenosine-mediated Nrf2 Regulates the Defense Mechanism Against PM2.5-induced Pulmonary Fibrosis
Source: Research Square preprint supplement (doi:10.21203/rs.3.rs-631972/v1), 2021-06-30
Supplement: Supplementary file 1 [file 860633cb10a89f4499bfe8ea.docx]

**Additional files 5.** siRNA used in this study

| **siRNA Name** | **siRNA sequence(5’——3’)** | |
| --- | --- | --- |
| **sense** | **antisense** |
| YTHDF1  YTHDF2  YTHDF3  IGF2BP1  IGF2BP2  IGF2BP3  Nrf2  NC | CCUGCUCUUCAGCGUCAAUTT  AAGGACGUUCCCAAUAGCCAA  GGGAGAGAAAUAGAAACAATT  GGGAAGAAUCUAUGGCAAATT  CAAACUAGCCGAAGAGAUUTT  GCAGGAAUUGACGCUGUAUAATT  CUUGCAUUAAUUCGGGAUAUATT  UUCUCCGAACGUGUCACGUTT | AUUGACGCUGAAGAGCAGGTT  UUGGCUAUUGGGAACGUCCUU  UUGUUUCUAUUUCUCUCCCTT  UUUGCCAUAGAUUCUUCCCTT  AAUCUCUUCGGCUAGUUUGTT  UUAUACAGCGUCAAUUCCUGCTT  UAUAUCCCGAAUUAAUGCAAGTT  ACGUGACACGUUCGGAGAATT |
