# Supplementary material for: N6-methyladenosine-mediated Nrf2 Regulates the Defense Mechanism Against PM2.5-induced Pulmonary Fibrosis
Source: Research Square preprint supplement (doi:10.21203/rs.3.rs-631972/v1), 2021-06-30
Supplement: Supplementary file 2 [file 8f2341cd1140f1591de6b61d.docx]

**Additional files 3.** Primers used in this study

| **Primer Name** | **Primer sequence(5’——3’)** | |
| --- | --- | --- |
| **F** | **R** |
| Cloning Primers |  |  |
| 2AB-IGF2BP2-CDS  2AB-IGF2BP3-CDS | GGGGTACCATGATGAACAAGCTTTACATCG(Kpnl)  GGGGTACCATGAACAAACTGTATATCGGAAACC  (Kpnl) | ATAAGAATGCGGCCGCTCACTTGCTGCGCTGTGAG(Notl)  ATAAGAATGCGGCCGCTTACTTACTTCCGTCTTGACTGAGGTG(Notl) |
| Q-PCR Primers |  |  |
| ALKBH5(homo) | CGGCGAAGGCTACACTTACG | CCACCAGCTTTTGGATCACCA |
| ALKBH5(mouse) | GCGCGGTCATCAACGACTA | ATCAGCAGCATACCCACTGAG |
| CUL3(homo) | TGTGGAGAACGTCTACAATTTGG | GCGCCTCTGTCTACGACTT |
| CUL3(mouse) | GAGATCAAGTTGTACGGTATGGG | GCTCTCTGGCAATCATATCCAAT |
| FTO(homo) | ACTTGGCTCCCTTATCTGACC | TGTGCAGTGTGAGAAAGGCTT |
| FTO(mouse)  GAPDH(homo)  GAPDH(mouse)  KEAP1(homo)  KEAP1(mouse)  METTL3(homo)  METTL3(mouse)  METTL14(homo)  METTL14(mouse)  Nrf2(homo)  Nrf2(mouse)  Nrf2 Primer1(homo)  Nrf2 Primer2(homo)  Nrf2 Primer3(homo) | GACACTTGGCTTCCTTACCTG  TGTGGGCATCAATGGATTTGG  AATGGATTTGGACGCATTGGT  CTGGAGGATCATACCAAGCAGG  CGGGGACGCAGTGATGTATG  TTGTCTCCAACCTTCCGTAGT  CTGGGCACTTGGATTTAAGGAA  AGTGCCGACAGCATTGGTG  GAGCTGAGAGTGCGGATAGC  TCAGCGACGGAAAGAGTATGA  CTTTAGTCAGCGACAGAAGGAC  CTGGTCATCGGAAAACCCCA  CTCCACAGAAGACCCCAACC  GCTGAGCCCAGTATCAGCAA | CTCACCACGTCCCGAAACAA  ACACCATGTATTCCGGGTCAAT  TTTGCACTGGTACGTGTTGAT  GGATACCCTCAATGGACACCAC  TGTGTAGCTGAAGGTTCGGTTA  CCAGATCAGAGAGGTGGTGTAG  TGAGAGGTGGTGTAGCAACTT  GGAGCAGAGGTATCATAGGAAGC  GCAGATGTATCATAGGAAGCCC  CCACTGGTTTCTGACTGGATGT  AGGCATCTTGTTTGGGAATGTG  TGGAGAGCTTTTGCCCTAAGT  AGGGCATGCTGTTGCTGATA  AGGGTGGTTTTGGTTGAAAGC |
