# Supplementary material for: N6-methyladenosine-mediated Nrf2 Regulates the Defense Mechanism Against PM2.5-induced Pulmonary Fibrosis
Source: Research Square preprint supplement (doi:10.21203/rs.3.rs-631972/v1), 2021-06-30
Supplement: Supplementary file 3 [file 94ccaa767774ef764bcf7d4f.docx]

**Additional files 2. Reagent or Resource**

| REAGENT or RESOURCE | SOURCE | IDENTIFIER |
| --- | --- | --- |
| Antibodies |  |  |
| anti-β-actin | Cell Signaling Technology | Cat #4970 |
| anti-GAPDH (14C10)  anti-E-cadherin | Cell Signaling Technology  Cell Signaling Technology | Cat #2118  Cat#3195 |
| anti-rabbit IgG | Cell Signaling Technology | Cat #7074S |
| anti-mouse IgG  anti-HMOX1  anti-Nrf2  anti-KEAP1  anti-CUL3  anti-α-SMA  anti-Vimentin | Cell Signaling Technology  Proteintech  Bioworld  Bioworld  Proteintech  EarthOx  Santa Cruz | Cat #7076S  10701-1-AP  BS1258  BS6785  11107-1-AP  A307717-01  sc-5565 |
| anti-ALKBH5 | Sigma-Aldrich | Cat #HPA007196 |
| anti-FLAG | Sigma-Aldrich | Cat #F3165 |
| anti-METTL3 | Proteintech | Cat #15073-1-AP |
| anti-YTHDF1 | Proteintech | Cat #17479-1-AP |
| anti-YTHDF2 | Proteintech | Cat #24744-1-AP |
| anti-YTHDF3  anti-IGF2BP1  anti-IGF2BP2  anti-IGF2BP3 | Proteintech  Cell Signaling Technology  Abcam  Abcam | Cat #25537-1-AP  Cat#8482  ab128175  ab177477 |
| anti-m6A | Synaptic Systems | Cat #202 003 |
| Recombinant DNA | | |
| LentiORF pLEX-MCS | Thermo Fisher Scientific | Cat #OHS4735 |
| LentiORF pLEX-MCS-METTL3 | Generated in our lab before. |  |
| lentiCRISPR v2 | Addgene | Cat #52961 |
| lentiCRISPR v2-METTL3 | Generated in our lab before. |  |
| pcDNA3-Flag 2AB | gifted from Wang Min |  |
| pcDNA3-Flag 2AB-YTHDF1 | Generated in our lab before. |  |
| pcDNA3-Flag 2AB-YTHDF2 | This paper |  |
| pcDNA3-Flag 2AB-YTHDF3 | Thermo Fisher Scientific |  |
|  |
|  |
